# Supplementary material for: Global Association of the COVID-19 Pandemic With Pediatric Clinical Trial Publication
Source: PubMed Central journal article supplement (PMC10383004; doi:10.1001/jamanetworkopen.2023.26313), 2023-07-28
Supplement: jamanetwopen-e2326313-s002.pdf [file jamanetwopen-e2326313-s002.pdf]

## Data Sharing Statement

Grantham-Hill. Global Association of the COVID-19 Pandemic With Pediatric Clinical Trial  
Publication. *JAMA Netw Open*. Published July 28, 2023.

doi:10.1001/jamanetworkopen.2023.26313

### Data

**Data available:** Yes

**Data types:** Data (not involving human participants)

**How to access data:** Direct request to corresponding author ([ming.lim@gstt.nhs.uk](mailto:ming.lim@gstt.nhs.uk))

**When available:** With publication

### Supporting Documents

**Document types:** None

### Additional Information

**Who can access the data:** Anyone requesting

**Types of analyses:** Any purpose

**Mechanisms of data availability:** Signed data access agreement

**Any additional restrictions:** No
